# Supplementary material for: Dose‐dependent association of proton pump inhibitors use with gastric intestinal metaplasia among Helicobacter pylori‐positive patients
Source: PubMed Central journal article supplement — United European Gastroenterol J. 2021 Mar 18;9(3):343–53. doi: 10.1177/2050640620951403 (PMC8259238; doi:10.1177/2050640620951403), 2021-03-18
Supplement: UEG2-9-343-s001.pdf [file UEG2-9-343-s001.pdf]

| <b>Supporting Table 1. Association of BMI according to the WHO classification with diagnosis of GIM</b> |               |              |               |               |                |              |
|---------------------------------------------------------------------------------------------------------|---------------|--------------|---------------|---------------|----------------|--------------|
| <b>BMI-WHO</b>                                                                                          | <b>No GIM</b> | <b>GIM</b>   | <b>*AdjOR</b> | <b>95% CI</b> |                | <b>P</b>     |
|                                                                                                         | <b>N (%)</b>  | <b>N (%)</b> |               |               |                |              |
| <b>Underweight (&lt;18.5 kg/m<sup>2</sup>)</b>                                                          | 342 (96.1%)   | 14 (3.9%)    | 0.58          | 0.33          | 1.01           | 0.052        |
| <b>Normal weight(18.5-24.9 kg/m<sup>2</sup>)</b>                                                        | 4,428 (91.1%) | 431 (8.9%)   | 1.00          |               |                |              |
| <b>Pre-obese (25.0-29.9 kg/m<sup>2</sup>)</b>                                                           | 4,776 (90.4%) | 508 (9.6%)   | 0.93          | 0.64          | 1.07           | 0.303        |
| <b>Obese (≥30 kg/m<sup>2</sup>)</b>                                                                     | 3,126 (92.3%) | 261 (7.7%)   | 0.76          | 0.64          | 0.89           | <0.001       |
|                                                                                                         |               |              |               |               | <b>p-total</b> | <b>0.001</b> |

**\*Adjusted for age, gender, ethnicity, smoking, H. pylori status, anti-parietal cell antibodies and PPI use.**
